# Supplementary material for: Assessment of Sieverts Law Assumptions and ‘n’ Values in Palladium Membranes: Experimental and Theoretical Analyses
Source: MDPI journal article supplement (doi:10.3390/membranes11100778), 2021-10-12
Supplement: s1 [file s1]

Supplementary Material

# Assessment of Sieverts Law assumptions and ' $n$ ' Values in Palladium Membranes: Experimental and Theoretical Analyses

Abdulrahman Alraeesi <sup>1,\*</sup> and Tracy Gardner <sup>2</sup>

<sup>1</sup> Chemical and Petroleum Engineering Department, United Arab Emirates University, P.O Box 15551, Al Ain, United Arab Emirates; a.alraeesi@uaeu.ac.ae

<sup>2</sup> Chemical and Biological Engineering Department, Colorado School of Mines, Golden, CO 80401, USA; tgardner@mines.edu

\* Correspondence: a.alraeesi@uaeu.ac.ae

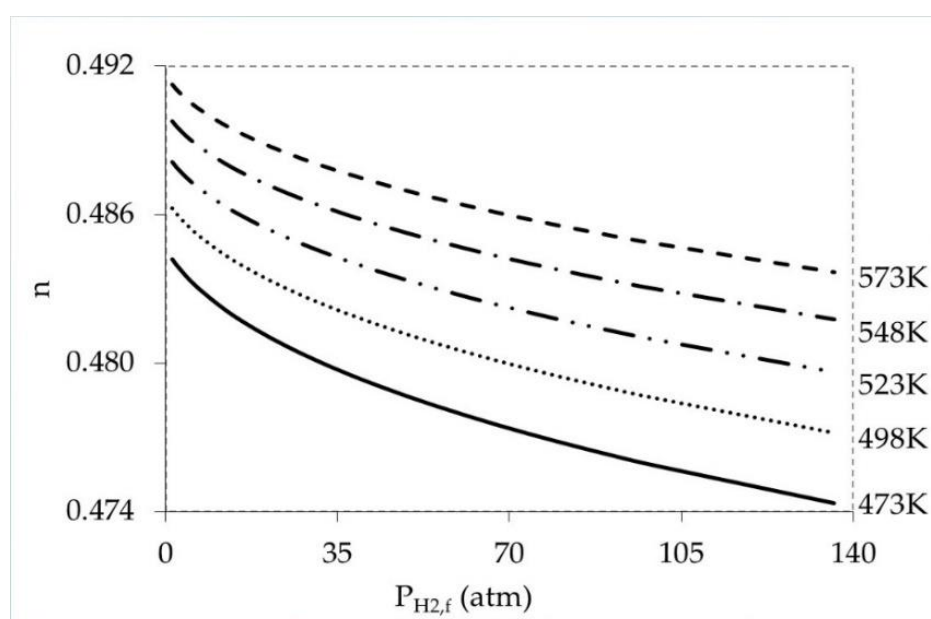

**Figure S1.** Modeling the effect of strong adsorption (high  $P$ ) on pressure exponent ( $n$ ) for temperature range of 473–573 K.

**Table S1.** Operation conditions for  $H_2$  in 25  $\mu m$  thick Pd-1 membrane foil permeability studies.

| Temperature<br>(K) | Partial pressure drop<br>(kPa) | Feed mixture<br>% He in $H_2$ | Feed pressure<br>(kPa) | Permeate pressure<br>(kPa) |
|--------------------|--------------------------------|-------------------------------|------------------------|----------------------------|
| 523                | 21, 62, 117                    | 5–83                          | 221                    | 93                         |
